# Supplementary material for: Long Noncoding RNA ZBED5-AS1 Facilitates Tumor Progression and Metastasis in Lung Adenocarcinoma via ZNF146/ATR/Chk1 Axis
Source: MDPI journal article supplement (doi:10.3390/ijms241813925), 2023-09-10
Supplement: s1 [file s1]

**Supplementary Table S1 Primer sequence of genes**

| <b>Primer (F)</b> | <b>Sequence(5'to3')</b>         | <b>Primer (R)</b> | <b>Sequence(5'to3')</b>      |
|-------------------|---------------------------------|-------------------|------------------------------|
| ZBED5-A<br>S1-F   | CTCAAACCTTCACTAGCCCCGT          | ZBED5-AS<br>1-R   | GAATGGGATGGGAGGACA<br>CA     |
| ZNF146-F          | TTTGGTCTTTGTCCGCGGGT            | ZNF146-R          | TCTTCTCAGGCTTCTTCCGC         |
| ATR-F             | TGTCTGTACTCTTCACGGCAT<br>GTT    | ATR-R             | AAGAGGTCCACATGTCCGT<br>GTT   |
| Chk1-F            | GGTGAATATAGTGCTGCTAT<br>GTTGACA | Chk1-R            | TTGGATAAACAGGGAAGT<br>GAACAC |
| $\beta$ -actin-F  | CCTGGCACCCAGCACAAT              | $\beta$ -actin-R  | GCTGATCCACATCTGCTGG<br>AA    |
| U6-F              | AGAGAAGATCGGCATGGTTA<br>CTG     | U6-R              | ACCTGAGCGCATTGTC<br>CGAGG    |
| GAPDH-F           | GACGCGTGGGAACATGAGAC<br>A       | GAPDH-R           | ATGACCTGGACGGTCGAG<br>CGC    |
