# Supplementary material for: Long Noncoding RNA ZBED5-AS1 Facilitates Tumor Progression and Metastasis in Lung Adenocarcinoma via ZNF146/ATR/Chk1 Axis
Source: Int J Mol Sci. 2023 Sep 10;24(18):13925. doi: 10.3390/ijms241813925 (PMC10530271; doi:10.3390/ijms241813925)
Supplement: Supplementary file 1 [file ijms-24-13925-s001.zip › DetailedClinicalData.xlsx]

## Sheet: Sheet 1
Diagnosis	ID2	ZBED5-AS1	group	gender	age	TMN	T	N.stage	M.stage	Tumor size	CEA(μg/L)	NSE（ng/ml）	ProGRP(ng/l)	D-D	LDH（U/L）	PLT
Lung Adenocarcinoma	FAI001	0.111646	Group1	female	>65	T2bN0M0	T2	N0	M0	>2	14.9	13.2	65	0.97	148	204
Lung Adenocarcinoma	FAI002	0.14141	Group1	male	≤65	T1bN0M0	T1	N0	M0	≤2	6.9	33.2	30	1.38		301
Lung Adenocarcinoma	FAI003	0.154006	Group1	female	>65	T1bN1M0	T1	N1	M0	≤2	0.8	9.1	41	0.34	178	212
Lung Adenocarcinoma	FAI004	0.245798	Group1	male	>65	T1bN0M0	T1	N0	M0	>2	2.8	11.1	40	0.38	184	307
Lung Adenocarcinoma	FAI005	0.257684	Group1	female	≤65	T2aN1M1	T2	N1	M1	>2	7.8	8.9	52	0.95		184
Lung Adenocarcinoma	FAI006	0.468685	Group1	male	>65	T2bN1M0	T2	N1	M0	>2	36.3	68.7	25	0.2	378	230
Lung Adenocarcinoma	FAI007	0.525949	Group1	female	≤65	T4N1M0	T4	N1	M0	>2	5.4	15.3	58	0.3		321
Lung Adenocarcinoma	FAI008	0.606635	Group1	male	≤65	T1bN0M0	T1	N0	M0	≤2	2.7	10.4	67	0.52	186	233
Lung Adenocarcinoma	FAI009	0.722506	Group1	male	≤65	T4N1M0	T4	N1	M0	>2	2.3	39.8	51	0.35	202	248
Lung Adenocarcinoma	FAI010	0.755812	Group1	female	≤65	T1bN0M0	T1	N0	M0	≤2	1.1	20.6	35	0.3	174	170
Lung Adenocarcinoma	FAI011	0.762627	Group1	female	>65	T1bN0M0	T1	N0	M0	≤2	1.9	15.7	39	0.31	185	254
Lung Adenocarcinoma	FAI012	0.785702	Group1	male	>65	T1bN0M0	T1	N0	M0	≤2	5.2	9		1.58	179	261
Lung Adenocarcinoma	FAI013	0.810879	Group1	female	≤65	T1bN0M0	T1	N0	M0	≤2	4.3	9.5	42	0.28	151	284
Lung Adenocarcinoma	FAI014	0.902515	Group1	female	≤65	T1bN0M0	T1	N0	M0	≤2	2.3			0.26	187	274
Lung Adenocarcinoma	FAI015	0.925939	Group1	female	≤65	T1bN0M0	T1	N0	M0	≤2	0.8	12.6	38	0.32	169	343
Lung Adenocarcinoma	FAI016	0.981698	Group1	male	≤65	T1bN0M0	T1	N0	M0	≤2	2.5	14.2		0.63	192	246
Lung Adenocarcinoma	FAI017	1.01041	Group1	female	>65	T1bN1M0	T1	N1	M0	≤2	4.6	23.4	58	0.75	225	183
Lung Adenocarcinoma	FAI018	1.01537	Group1	male	≤65	T1bN0M0	T1	N0	M0	≤2	2.2	27.7	36	0.35	170	212
Lung Adenocarcinoma	FAI019	1.02231	Group1	female	≤65	T1bN0M0	T1	N0	M0	≤2	1	12.6	40	0.33	176	155
Lung Adenocarcinoma	FAI020	1.11686	Group1	female	≤65	T2aN0M0	T2	N0	M0	>2	5.3	24.8		0.42		242
Lung Adenocarcinoma	FAI021	1.33136	Group1	female	≤65	T1cN0M0	T1	N0	M0	>2	1.1	12.5	28	0.32	246	208
Lung Adenocarcinoma	FAI022	1.40923	Group1	male	>65	T1bN0M0	T1	N0	M0	≤2	0.8	12.4	50	0.32	164	182
Lung Adenocarcinoma	FAI023	1.66347	Group1	male	>65	T1aN0M0	T1	N0	M0	≤2	1.2	9.4	56	0.29	148	186
Lung Adenocarcinoma	FAI024	1.73444	Group1	male	≤65	T1bN0M0	T1	N0	M0	≤2	4.3	8.8	59	0.2	130	168
Lung Adenocarcinoma	FAI025	1.7683	Group1	male	>65	T1cN0M0	T1	N0	M0	>2	4.5	9.5	71	1.03		171
Lung Adenocarcinoma	FAI026	1.81001	Group1	male	≤65	T1bN0M0	T1	N0	M0	≤2	1.4	18.3	44	1.28	160	212
Lung Adenocarcinoma	FAI027	1.97179	Group1	female	≤65	T1bN0M0	T1	N0	M0	≤2	1.7	10.4	87	0.28	160	294
Lung Adenocarcinoma	FAI028	2.00458	Group1	female	≤65	T1bN0M0	T1	N0	M0	≤2	1.7	10.9	57	0.71	197	332
Lung Adenocarcinoma	FAI029	2.12754	Group2	female	>65	T3N1M0	T3	N1	M0	>2	2.1			0.76	275	311
Lung Adenocarcinoma	FAI030	2.13155	Group2	female	≤65	T1bN0M0	T1	N0	M0	≤2	1.9	11		1.08	139	233
Lung Adenocarcinoma	FAI031	2.14755	Group2	female	≤65	T1cN0M0	T1	N0	M0	>2	9.5	13.9	56	1.1	204	215
Lung Adenocarcinoma	FAI032	2.21157	Group2	male	>65	T1bN0M0	T1	N0	M0	≤2	7	16.4	66	2.36	238	257
Lung Adenocarcinoma	FAI033	2.26263	Group2	male	>65		X	X	X	X	1.8	12.1	74	1.01	187	230
Lung Adenocarcinoma	FAI034	2.32575	Group2	female	≤65	T1aN0M0	T1	N0	M0	≤2	2.3	7.3	35	0.28	197	253
Lung Adenocarcinoma	FAI035	2.38166	Group2	male	≤65	T2aN0M0	T2	N0	M0	>2	1.9	16.2	70	1.61	265	323
Lung Adenocarcinoma	FAI036	2.40512	Group2	female	≤65	T1bN0M0	T1	N0	M0	>2	2.8	8.8	45	0.37	182	320
Lung Adenocarcinoma	FAI037	2.41987	Group2	male	≤65	T1bN0M0	T1	N0	M0	≤2				0.17	174	295
Lung Adenocarcinoma	FAI038	2.44266	Group2	male	>65	T1cN0M0	T1	N0	M0	>2	21.8	14.4	98	1.66	185	253
Lung Adenocarcinoma	FAI039	2.59049	Group2	female	≤65	T1bN0M0	T1	N0	M0	≤2	1.3	18.1	79	0.37	238	286
Lung Adenocarcinoma	FAI040	3.04618	Group2	female	>65	T1bN0M0	T1	N0	M0	≤2	3.6	54	39	0.32	179	230
Lung Adenocarcinoma	FAI041	3.12805	Group2	male	>65	T2bN0M0	T2	N0	M0	>2	2.1	12.5	9	0.91	249	210
Lung Adenocarcinoma	FAI042	3.35404	Group2	male	≤65	T1bN0M0	T1	N0	M0	≤2	4.2	11	24	0.41	224	301
Lung Adenocarcinoma	FAI043	3.64853	Group2	male	>65	T1cN0M0	T1	N0	M0	>2	20.2	13.1	42	1.02	234	120
Lung Adenocarcinoma	FAI044	3.67506	Group2	female	>65	T1cN0M0	T1	N0	M0	>2	2.1	16.6	35	0.32	263	195
Lung Adenocarcinoma	FAI045	4.29337	Group2	male	>65	T2bN0M0	T2	N0	M0	>2				0.61	200	211
Lung Adenocarcinoma	FAI046	6.0909	Group2	female	≤65	T1bN0M0	T1	N0	M0	>2	2.6	6.9	19	2.92		30
Lung Adenocarcinoma	FAI047	6.78806	Group2	female	≤65	T1bN0M0	T1	N0	M0	≤2	3.7	8.1	33	0.31	163	238
Lung Adenocarcinoma	FAI048	7.45392	Group2	female	≤65	T1aN0M0	T1	N0	M0	≤2	1	13.3		0.93	179	269
Lung Adenocarcinoma	FAI049	7.97173	Group2	male	>65	T2aN0M0	T2	N0	M0	>2	7.3	14	79	0.96	163	392
Lung Adenocarcinoma	FAI050	9.62642	Group2	female	>65	T1bN0M0	T1	N0	M0	≤2	1.8	13.1		0.95	207	245
Lung Adenocarcinoma	FAI051	9.99011	Group2	female	>65	T2aN0M0	T2	N0	M0	>2	3.9	11.7		16.9	167	306
Lung Adenocarcinoma	FAI052	16.9859	Group2	female	≤65	T1bN0M0	T1	N0	M0	≤2	1.3	18.1	79	0.37	238	286
Lung Adenocarcinoma	FAI053	34.1781	Group2	male	≤65	T1cN0M0	T1	N0	M0	>2	10.4	16.9			179	293
Lung Adenocarcinoma	FAI054	52.4445	Group2	male	≤65	T1cN0M0	T1	N0	M0	>2	14.5	8.7	49	0.47	156
Lung Adenocarcinoma	FAI055	111.979	Group2	female	≤65	T1bN0M0	T1	N0	M0	≤2	2.3	9.3	50	0.25	187	239
Lung Adenocarcinoma	FAI056	776.047	Group2	male	≤65	T1bN0M0	T1	N0	M0	≤2	1.2	16.1	40	1.04	178	199
